# Supplementary material
Source: publisher site journal article supplement (https://www.dovepress.com/get_supplementary_file.php?f=392932.docx)
Supplement: Supplementary file 1 [file get_supplementary_file.php]

**Table S1.Treatment and post-discharge follow-up results for patients with and without pancreatic exocrine insufficiency**

| ﻿Items | N(%), mean(SD)/Median(IQR) | | P-value |
| --- | --- | --- | --- |
| PEI (n = 38) | Non-PEI (n =67) |
| Recurrences of AP |  |  | 0.076 |
| Yes | 16 | 17 |  |
| No | 22 | 50 |  |
| Chronic pancreatitis |  |  | 0.046* |
| Yes | 6 | 2 |  |
| No | 32 | 65 |  |
| Diabetes after AP |  |  | 0.255 |
| Yes | 13 | 16 |  |
| No | 25 | 51 |  |
| Weight loss after discharge |  |  | 0.000** |
| Yes | 19(50.000%) | 9(13.433%) |  |
| No | 19(50.000%) | 58(86.567%) |  |
| Fatty diarrhea |  |  | 0.001** |
| Yes | 9(23.684%) | 0(0.000%) |  |
| No | 29(76.316%) | 67(100.000%) |  |
| QOL | 85.000(80.000, 88.000) | 85.000(75.000, 95.000) | 0.879 |

**Notes:**

**Abbreviations:**AP,Acute pancreatitis; QOL, Quality of Life.

* Statistical difference, P < 0.05.

** Statistical difference, P < 0.01.

The following table shows the follow up data which has been analyzed and showed in Table S1. All these contents are cited in the manuscript as Table S1.

| Group | PEI | r-AP | CP | Newly developed diabetes | Fatty diarrhea | PERT | QoL | Weight change |
| --- | --- | --- | --- | --- | --- | --- | --- | --- |
| 0 | 0 | 1 | 0 | 1 | 0 | 0 | 100 | 10 |
| 0 | 0 | 1 | 0 | 0 | 0 | 0 | 100 | 15 |
| 0 | 0 | 0 | 0 | 1 | 0 | 0 | 100 | 10 |
| 0 | 0 | 0 | 0 | 0 | 0 | 0 | 100 | 3 |
| 0 | 0 | 1 | 0 | 1 | 0 | 0 | 70 | 5 |
| 0 | 0 | 0 | 1 | 1 | 0 | 0 | 80 | 10 |
| 0 | 0 | 0 | 0 | 0 | 0 | 0 | 100 | 10 |
| 0 | 0 | 0 | 0 | 0 | 0 | 0 | 100 | 10 |
| 0 | 0 | 0 | 0 | 1 | 0 | 0 | 86 | 5 |
| 0 | 0 | 1 | 0 | 1 | 0 | 1 | 85 | -4 |
| 0 | 0 | 0 | 0 | 0 | 0 | 0 | 85 | 0 |
| 0 | 0 | 0 | 0 | 0 | 0 | 0 | 100 | 10 |
| 0 | 0 | 0 | 0 | 0 | 0 | 0 | 90 | 12 |
| 0 | 0 | 0 | 0 | 0 | 0 | 0 | 88 | 5 |
| 0 | 0 | 0 | 0 | 0 | 0 | 0 | 88 | 4 |
| 0 | 0 | 0 | 0 | 0 | 0 | 0 | 88 | 0 |
| 0 | 0 | 0 | 0 | 0 | 0 | 0 | 85 | 20 |
| 0 | 0 | 0 | 0 | 0 | 0 | 0 | 100 | 6 |
| 0 | 0 | 0 | 0 | 0 | 0 | 0 | 85 | 5 |
| 0 | 0 | 0 | 0 | 1 | 0 | 0 | 88 | -3 |
| 0 | 0 | 1 | 0 | 0 | 0 | 0 | 88 | 0 |
| 0 | 0 | 0 | 0 | 0 | 0 | 0 | 95 | 6 |
| 0 | 0 | 1 | 0 | 0 | 0 | 0 | 80 | 5 |
| 0 | 0 | 1 | 0 | 0 | 0 | 0 | 90 | 25 |
| 0 | 0 | 0 | 0 | 0 | 0 | 0 | 95 | 3 |
| 0 | 0 | 0 | 0 | 1 | 0 | 0 | 100 | -2 |
| 0 | 0 | 0 | 0 | 0 | 0 | 0 | 100 | 5 |
| 0 | 0 | 0 | 0 | 0 | 0 | 0 | 100 | 10 |
| 0 | 0 | 0 | 0 | 0 | 0 | 0 | 80 | 3 |
| 0 | 0 | 1 | 0 | 1 | 0 | 0 | 100 | 5 |
| 0 | 0 | 0 | 0 | 1 | 0 | 0 | 70 | 5 |
| 0 | 0 | 1 | 0 | 0 | 0 | 0 | 65 | 0 |
| 0 | 0 | 0 | 0 | 0 | 0 | 0 | 100 | 3 |
| 0 | 0 | 0 | 0 | 0 | 0 | 0 | 88 | 3 |
| 0 | 0 | 0 | 0 | 0 | 0 | 0 | 100 | 0 |
| 0 | 0 | 1 | 0 | 1 | 0 | 0 | 85 | -30 |
| 0 | 0 | 0 | 0 | 0 | 0 | 0 | 85 | 3 |
| 0 | 0 | 0 | 0 | 0 | 0 | 0 | 85 | 15 |
| 0 | 0 | 0 | 0 | 1 | 0 | 0 | 85 | 3 |
| 0 | 0 | 0 | 0 | 1 | 0 | 0 | 88 | 10 |
| 0 | 0 | 1 | 0 | 0 | 0 | 0 | 80 | 10 |
| 0 | 0 | 0 | 0 | 0 | 0 | 0 | 85 | 3 |
| 0 | 0 | 0 | 0 | 0 | 0 | 0 | 75 | 5 |
| 0 | 0 | 0 | 0 | 0 | 0 | 0 | 88 | 15 |
| 0 | 0 | 0 | 0 | 1 | 0 | 0 | 100 | 3 |
| 0 | 0 | 1 | 0 | 1 | 0 | 0 | 85 | 2 |
| 0 | 0 | 0 | 0 | 0 | 0 | 0 | 88 | 8 |
| 0 | 0 | 0 | 0 | 0 | 0 | 0 | 88 | -20 |
| 0 | 0 | 0 | 0 | 0 | 0 | 0 | 88 | 0 |
| 0 | 0 | 0 | 0 | 1 | 0 | 0 | 75 | -3 |
| 0 | 0 | 0 | 0 | 0 | 0 | 0 | 85 | 3 |
| 0 | 0 | 1 | 0 | 0 | 0 | 0 | 85 | 5 |
| 0 | 0 | 1 | 0 | 0 | 0 | 0 | 80 | 3 |
| 0 | 0 | 1 | 0 | 0 | 0 | 0 | 85 | -5 |
| 0 | 0 | 0 | 0 | 0 | 0 | 0 | 85 | 2 |
| 0 | 0 | 0 | 0 | 0 | 0 | 0 | 88 | 10 |
| 0 | 0 | 1 | 0 | 0 | 0 | 0 | 100 | 20 |
| 0 | 0 | 0 | 0 | 0 | 0 | 0 | 70 | -5 |
| 0 | 0 | 0 | 0 | 0 | 0 | 0 | 80 | 5 |
| 0 | 0 | 0 | 0 | 0 | 0 | 0 | 80 | 0 |
| 0 | 0 | 0 | 0 | 0 | 0 | 0 | 90 | -10 |
| 0 | 0 | 1 | 0 | 0 | 0 | 0 | 85 | 3 |
| 0 | 0 | 0 | 0 | 0 | 0 | 0 | 85 | 3 |
| 0 | 0 | 0 | 0 | 0 | 0 | 0 | 100 | 5 |
| 0 | 0 | 0 | 0 | 0 | 0 | 0 | 88 | 5 |
| 0 | 0 | 0 | 0 | 0 | 0 | 0 | 100 | 7 |
| 0 | 0 | 0 | 1 | 0 | 0 | 0 | 88 | 6 |
| 1 | 1 | 1 | 0 | 0 | 0 | 1 | 60 | -15 |
| 1 | 1 | 0 | 1 | 1 | 1 | 1 | 70 | -20 |
| 1 | 1 | 0 | 0 | 0 | 1 | 1 | 70 | -10 |
| 1 | 1 | 1 | 0 | 0 | 0 | 1 | 50 | -13 |
| 1 | 1 | 1 | 0 | 0 | 0 | 0 | 75 | 1 |
| 1 | 1 | 1 | 0 | 1 | 1 | 1 | 85 | 3 |
| 1 | 1 | 0 | 1 | 0 | 1 | 1 | 85 | 2 |
| 1 | 1 | 0 | 0 | 1 | 0 | 0 | 75 | -10 |
| 1 | 1 | 0 | 1 | 1 | 0 | 1 | 80 | 3 |
| 1 | 1 | 1 | 0 | 0 | 0 | 1 | 70 | -5 |
| 1 | 1 | 0 | 0 | 0 | 0 | 1 | 75 | -5 |
| 1 | 1 | 1 | 0 | 1 | 0 | 0 | 80 | 15 |
| 1 | 1 | 0 | 0 | 0 | 0 | 1 | 85 | 0 |
| 1 | 1 | 0 | 1 | 0 | 0 | 0 | 60 | -8 |
| 1 | 1 | 1 | 0 | 1 | 1 | 1 | 50 | -10 |
| 1 | 1 | 1 | 0 | 1 | 0 | 1 | 75 | 3 |
| 1 | 1 | 0 | 0 | 0 | 0 | 1 | 75 | -10 |
| 1 | 1 | 1 | 0 | 1 | 0 | 1 | 60 | -10 |
| 1 | 1 | 0 | 0 | 0 | 0 | 0 | 75 | -2 |
| 1 | 1 | 1 | 0 | 0 | 1 | 1 | 85 | 0 |
| 1 | 1 | 1 | 0 | 1 | 0 | 1 | 88 | 10 |
| 1 | 1 | 0 | 0 | 0 | 0 | 1 | 80 | 5 |
| 1 | 1 | 1 | 0 | 0 | 1 | 1 | 100 | 12 |
| 1 | 1 | 1 | 0 | 0 | 0 | 1 | 60 | -3 |
| 1 | 1 | 1 | 0 | 1 | 0 | 1 | 65 | -7 |
| 1 | 1 | 0 | 0 | 0 | 0 | 0 | 70 | -10 |
| 1 | 1 | 0 | 0 | 0 | 0 | 1 | 85 | 10 |
| 1 | 1 | 1 | 0 | 1 | 1 | 1 | 75 | 6 |
| 1 | 1 | 0 | 1 | 0 | 0 | 0 | 80 | -15 |
| 1 | 1 | 0 | 0 | 0 | 0 | 1 | 75 | -3 |
| 1 | 1 | 0 | 1 | 1 | 0 | 1 | 80 | 6 |
| 1 | 1 | 1 | 0 | 0 | 1 | 1 | 80 | 3 |
| 1 | 1 | 0 | 0 | 0 | 0 | 1 | 80 | 7 |
| 1 | 1 | 0 | 0 | 1 | 0 | 1 | 75 | 0 |
| 1 | 1 | 0 | 0 | 0 | 0 | 1 | 80 | 5 |
| 1 | 1 | 0 | 0 | 0 | 0 | 1 | 75 | -2 |
| 1 | 1 | 0 | 0 | 0 | 0 | 1 | 80 | 0 |
| 1 | 1 | 0 | 0 | 0 | 0 | 0 | 75 | -3 |
